# Supplementary material for: Microbiota influence the development of the brain and behaviors in C57BL/6J mice
Source: PubMed Central journal article supplement (PMC6075787; doi:10.1371/journal.pone.0201829), 2018-08-03
Supplement: pone.0201829.s001.pdf [file pone.0201829.s001.pdf]

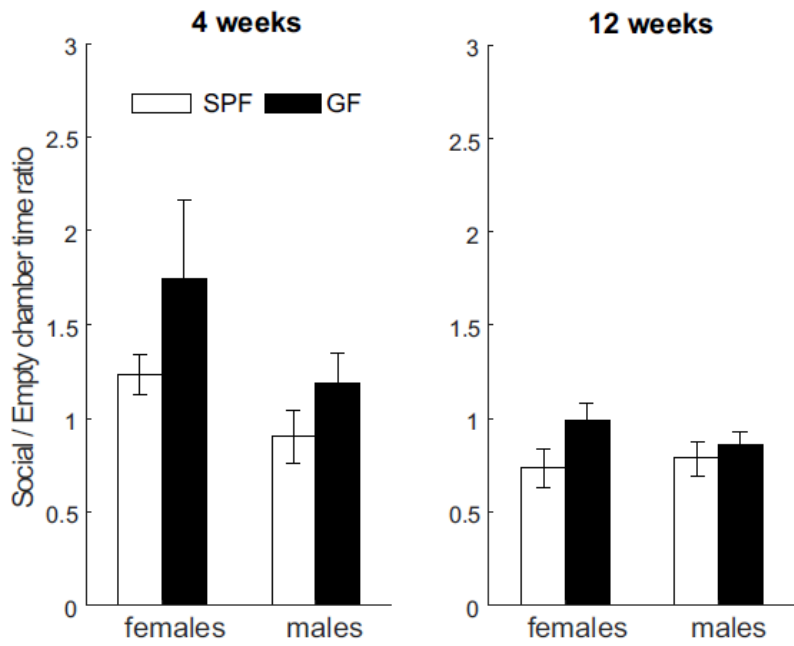

A

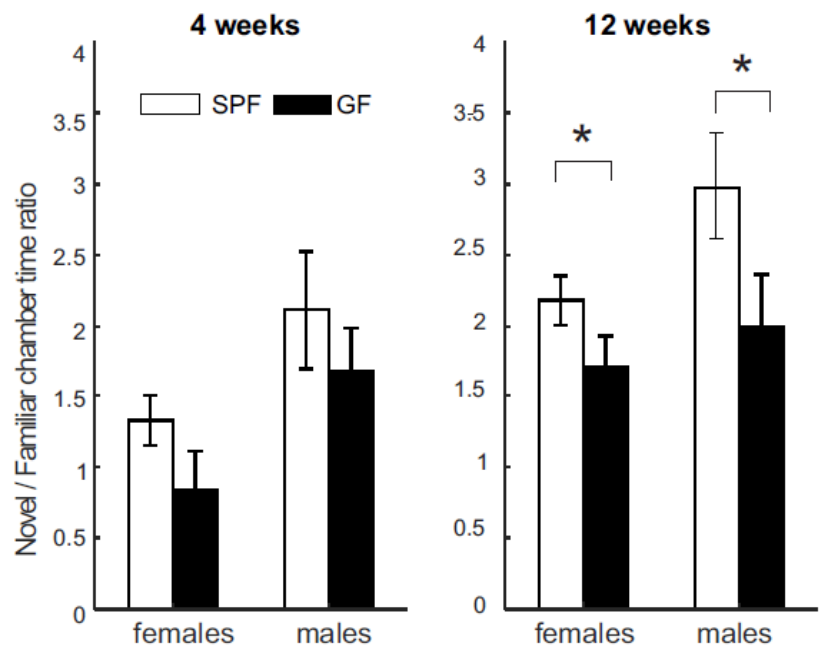

B
