# Supplementary material for: Microbiota influence the development of the brain and behaviors in C57BL/6J mice
Source: PubMed Central journal article supplement (PMC6075787; doi:10.1371/journal.pone.0201829), 2018-08-03
Supplement: pone.0201829.s002.pdf [file pone.0201829.s002.pdf]

| Volume                               | 4 weeks SPF     |                 | 4weeks GF        |                 | p-value                      |                |                              | 12 weeks SPF    |                 | 12 week s GF    |                 | p-value                    |                |                |
|--------------------------------------|-----------------|-----------------|------------------|-----------------|------------------------------|----------------|------------------------------|-----------------|-----------------|-----------------|-----------------|----------------------------|----------------|----------------|
|                                      | female          | male            | female           | male            | treatment                    | gender         | interaction                  | female          | male            | female          | male            | treatment                  | gender         | interaction    |
| Hippocampus                          | 21.16±<br>0.33  | 20.54±<br>0.51  | 21.02±<br>0.55   | 21.43±<br>0.49  | .495<br>(.72)                | .848<br>(.969) | .345<br>(.646)               | 22.91±<br>0.35  | 23.32±<br>0.26  | 22.88±<br>0.51  | 22.71±<br>0.42  | .435<br>(.733)             | .767<br>(.877) | .483<br>(.844) |
| Corpus callosum/<br>external capsule | 9.08±<br>0.20   | 8.62±<br>0.29   | 9.53±<br>0.08    | 9.48±<br>0.26   | <b>.041</b><br><b>(.164)</b> | .403<br>(.812) | .508<br>(.646)               | 10.25±<br>0.34  | 9.98±<br>0.28   | 9.86±<br>0.31   | 9.80±<br>0.37   | .458<br>(.733)             | .668<br>(.877) | .791<br>(.844) |
| Caudate-<br>putamen                  | 22.62±<br>0.33  | 22.15±<br>0.43  | 22.91±<br>0.43   | 22.57±<br>0.43  | .47 (.72)                    | .409<br>(.812) | .893<br>(.957)               | 24.77±<br>0.30  | 24.29±<br>0.23  | 23.38±<br>0.36  | 23.80±<br>0.43  | <b>.01</b><br><b>(.16)</b> | .925<br>(.987) | .205<br>(.547) |
| Anterior<br>commissure               | 5.94±<br>0.26   | 5.56±<br>0.30   | 6.95±<br>0.20    | 6.53±<br>0.30   | <b>.007</b><br><b>(.112)</b> | .249<br>(.812) | .956<br>(.957)               | 6.70±<br>0.28   | 6.20±<br>0.34   | 6.43±<br>0.39   | 6.43±<br>0.37   | .959<br>(.959)             | .503<br>(.877) | .513<br>(.844) |
| Internal capsule                     | 3.58±<br>0.16   | 3.22±<br>0.11   | 4.04±<br>0.68    | 4.03±<br>0.28   | <b>.015</b><br><b>(.12)</b>  | .457<br>(.812) | .487<br>(.646)               | 4.01±<br>0.14   | 3.64±<br>0.09   | 3.66±<br>0.12   | 3.89±<br>0.12   | .743<br>(.959)             | .638<br>(.877) | .048<br>(.384) |
| Thalamus                             | 22.78±<br>0.32  | 22.45±<br>0.46  | 23.63±<br>0.24   | 23.94±<br>0.44  | <b>.023</b><br><b>(.123)</b> | .989<br>(.997) | .525<br>(.646)               | 25.44±<br>0.23  | 25.15±<br>0.33  | 24.95±<br>0.26  | 24.85±<br>0.40  | .242<br>(.553)             | .551<br>(.877) | .774<br>(.844) |
| Cerebellum                           | 49.38±<br>0.71  | 48.69±<br>0.99  | 46.39±<br>2.31   | 48.57±<br>1.45  | .233<br>(.466)               | .565<br>(.859) | .272<br>(.646)               | 53.85±<br>0.62  | 54.00±<br>0.52  | 52.93±<br>0.67  | 53.27±<br>0.40  | .232<br>(.553)             | .721<br>(.877) | .887<br>(.887) |
| Superior colliculi                   | 7.44±<br>0.09   | 7.41±<br>0.14   | 7.46±<br>0.22    | 7.85±<br>0.17   | .182<br>(.416)               | .283<br>(.812) | .205<br>(.646)               | 7.92±<br>0.07   | 8.29±<br>0.16   | 8.25±<br>0.12   | 8.25±<br>0.13   | .288<br>(.576)             | .18<br>(.877)  | .168<br>(.541) |
| Hypothalamus                         | 11.82±<br>0.12  | 11.67±<br>0.19  | 11.56±<br>0.36   | 12.10±<br>0.28  | .708<br>(.853)               | .402<br>(.812) | .152<br>(.646)               | 12.78±<br>0.11  | 12.75±<br>0.24  | 12.82±<br>0.18  | 12.68±<br>0.16  | .956<br>(.959)             | .676<br>(.877) | .791<br>(.844) |
| Inferior colliculi                   | 5.68±<br>0.09   | 5.30±<br>0.10   | 5.21±<br>0.14    | 5.59±<br>0.22   | .573<br>(.764)               | .997<br>(.997) | <b>.018</b><br><b>(.264)</b> | 5.96±<br>0.09   | 6.09±<br>0.16   | 5.84±<br>0.13   | 5.85±<br>0.09   | .201<br>(.553)             | .596<br>(.877) | .658<br>(.844) |
| Neocortex                            | 120.92±<br>1.23 | 117.67±<br>1.66 | 118.05±<br>2.72  | 117.57±<br>2.46 | .483<br>(.72)                | .38<br>(.812)  | .513<br>(.646)               | 119.78±<br>1.22 | 120.65±<br>1.04 | 120.48±<br>0.72 | 119.63±<br>1.92 | .906<br>(.959)             | .996<br>(.996) | .538<br>(.844) |
| Amygdala                             | 16.15±<br>0.21  | 15.50±<br>0.32  | 15.40±<br>0.57   | 16.39±<br>0.37  | .851<br>(.853)               | .644<br>(.859) | .033<br>(.264)               | 17.47±<br>0.38  | 17.79±<br>0.30  | 17.04±<br>0.47  | 17.69±<br>0.60  | .555<br>(.807)             | .283<br>(.877) | .715<br>(.844) |
| Olfactory bulbs                      | 22.47±<br>0.36  | 22.38±<br>0.41  | 21.20±<br>0.82   | 21.85±<br>0.61  | .11<br>(.352)                | .619<br>(.859) | .507<br>(.646)               | 24.95±<br>0.30  | 23.99±<br>0.43  | 24.95±<br>0.22  | 25.65±<br>0.30  | .043<br>(.292)             | .738<br>(.877) | .042<br>(.384) |
| Brainstem                            | 49.80±<br>1.41  | 53.34±<br>1.42  | 49.56±<br>3.08   | 52.90±<br>1.30  | .853<br>(.853)               | .067<br>(.812) | .957<br>(.957)               | 61.23±<br>0.95  | 61.00±<br>0.71  | 61.75±<br>1.63  | 64.69±<br>0.91  | .073<br>(.292)             | .24<br>(.877)  | .169<br>(.541) |
| Fimbria                              | 2.17±<br>0.06   | 2.25±<br>0.06   | 2.24±<br>0.25    | 2.43±<br>0.05   | .167<br>(.416)               | .119<br>(.812) | .524<br>(.646)               | 2.42±<br>0.03   | 2.55±<br>0.06   | 2.41±<br>0.06   | 2.35±<br>0.06   | .071<br>(.292)             | .548<br>(.877) | .117<br>(.541) |
| Total brain                          | 408.04±<br>4.28 | 403.89±<br>6.78 | 402.91±<br>10.26 | 413.01±<br>8.79 | .802<br>(.853)               | .709<br>(.873) | .373<br>(.646)               | 442.91±<br>3.96 | 442.05±<br>2.12 | 439.74±<br>3.38 | 443.46±<br>4.72 | .83<br>(.959)              | .727<br>(.877) | .578<br>(.844) |
