# Supplementary material for: Microbiota influence the development of the brain and behaviors in C57BL/6J mice
Source: PubMed Central journal article supplement (PMC6075787; doi:10.1371/journal.pone.0201829), 2018-08-03
Supplement: pone.0201829.s003.pdf [file pone.0201829.s003.pdf]

| Volume Normalized                 | 4 weeks SPF     |                | 4weeks GF      |                | p-value                      |                              |                              | 12 weeks SPF    |                | 12 week s GF    |                 | p-value                                |                |                             |
|-----------------------------------|-----------------|----------------|----------------|----------------|------------------------------|------------------------------|------------------------------|-----------------|----------------|-----------------|-----------------|----------------------------------------|----------------|-----------------------------|
|                                   | female          | male           | female         | male           | treatment                    | gender                       | interaction                  | female          | male           | female          | male            | treatment                              | gender         | interaction                 |
| Hippocampus                       | 5.19±<br>0.05   | 5.08±<br>0.06  | 5.23±<br>0.20  | 5.19±<br>0.06  | .356<br>(.445)               | .393<br>(.536)               | .673<br>(.903)               | 5.17±<br>0.06   | 5.28±<br>0.06  | 5.20±<br>0.10   | 5.12±<br>0.05   | .41<br>(.662)                          | .887<br>(.887) | .232<br>(.476)              |
| Corpus callosum /external capsule | 2.23±<br>0.05   | 2.13±<br>0.06  | 2.37±<br>0.05  | 2.29±<br>0.04  | <b>.02</b><br><b>(.05)</b>   | .182<br>(.396)               | .869<br>(.94)                | 2.31±<br>0.06   | 2.26±<br>0.07  | 2.24±<br>0.06   | 2.21±<br>0.07   | .441<br>(.662)                         | .584<br>(.782) | .923<br>(.923)              |
| Caudate-putamen                   | 5.54±<br>0.04   | 5.48±<br>0.04  | 5.69±<br>0.05  | 5.47±<br>0.03  | .177<br>(.295)               | <b>.006</b><br><b>(.065)</b> | .1<br>(.5)                   | 5.59±<br>0.03   | 5.49±<br>0.04  | 5.32±<br>0.06   | 5.36±<br>0.05   | <b>&lt;0.001</b><br><b>(&lt;0.001)</b> | .583<br>(.782) | .108<br>(.27)               |
| Anterior commissure               | 1.46±<br>0.07   | 1.37±<br>0.07  | 1.73±<br>0.07  | 1.58±<br>0.07  | <b>.007</b><br><b>(.035)</b> | .171<br>(.396)               | .722<br>(.903)               | 1.51±<br>0.06   | 1.40±<br>0.08  | 1.46±<br>0.09   | 1.45±<br>0.08   | .987<br>(.987)                         | .462<br>(.782) | .568<br>(.775)              |
| Internal capsule                  | 0.88±<br>0.04   | 0.80±<br>0.02  | 1.00±<br>0.16  | 0.98±<br>0.06  | <b>.014</b><br><b>(.045)</b> | .372<br>(.536)               | .631<br>(.903)               | 0.90±<br>0.03   | 0.82±<br>0.02  | 0.83±<br>0.03   | 0.88±<br>0.03   | .776<br>(.97)                          | .587<br>(.782) | .062<br>(.27)               |
| Thalamus                          | 5.58±<br>0.03   | 5.56±<br>0.04  | 5.87±<br>0.11  | 5.80±<br>0.05  | <b>.001</b><br><b>(.015)</b> | .38<br>(.536)                | .652<br>(.903)               | 5.74±<br>0.04   | 5.69±<br>0.05  | 5.67±<br>0.03   | 5.60±<br>0.04   | .144<br>(.36)                          | .219<br>(.782) | .892<br>(.923)              |
| Cerebellum                        | 12.10<br>± 0.09 | 12.05±<br>0.11 | 11.49±<br>0.30 | 11.74±<br>0.12 | <b>.003</b><br><b>(.023)</b> | .481<br>(.601)               | .304<br>(.903)               | 12.16<br>± 0.06 | 12.22±<br>0.11 | 12.04<br>± 0.12 | 12.01<br>± 0.05 | .106<br>(.318)                         | .848<br>(.887) | .679<br>(.849)              |
| Superior colliculi                | 1.82±<br>0.01   | 1.83±<br>0.01  | 1.85±<br>0.05  | 1.90±<br>0.02  | <b>.04</b><br><b>(.086)</b>  | .185<br>(.396)               | .377<br>(.903)               | 1.79±<br>0.02   | 1.88±<br>0.03  | 1.88±<br>0.03   | 1.86±<br>0.02   | .207<br>(.388)                         | .235<br>(.782) | .076<br>(.27)               |
| Hypothalamus                      | 2.90±<br>0.02   | 2.89±<br>0.03  | 2.87±<br>0.04  | 2.93±<br>0.03  | .85<br>(.911)                | .351<br>(.536)               | .282<br>(.903)               | 2.89±<br>0.03   | 2.88±<br>0.05  | 2.92±<br>0.04   | 2.86±<br>0.04   | .933<br>(.987)                         | .493<br>(.782) | .55<br>(.775)               |
| Inferior colliculi                | 1.39±<br>0.02   | 1.31±<br>0.01  | 1.29±<br>0.03  | 1.35±<br>0.03  | .231<br>(.315)               | .636<br>(.734)               | <b>.007</b><br><b>(.105)</b> | 1.34±<br>0.01   | 1.38±<br>0.04  | 1.33±<br>0.02   | 1.32±<br>0.01   | .182<br>(.388)                         | .651<br>(.782) | .471<br>(.775)              |
| Neocortex                         | 29.65<br>± 0.21 | 29.16±<br>0.18 | 29.31±<br>0.22 | 28.48±<br>0.23 | <b>.05</b><br><b>(.094)</b>  | .013<br>(.065)               | .503<br>(.903)               | 27.04<br>± 0.13 | 27.29±<br>0.13 | 27.40<br>± 0.11 | 26.97<br>± 0.20 | .902<br>(.987)                         | .551<br>(.782) | <b>.036</b><br><b>(.27)</b> |
| Amygdala                          | 3.96±<br>0.05   | 3.84±<br>0.06  | 3.82±<br>0.08  | 3.97±<br>0.04  | .936<br>(.936)               | .82<br>(.82)                 | .053<br>(.398)               | 3.94±<br>0.06   | 4.03±<br>0.07  | 3.87±<br>0.10   | 3.99±<br>0.13   | .565<br>(.77)                          | .27<br>(.782)  | .865<br>(.923)              |
| Olfactory bulbs                   | 5.51±<br>0.07   | 5.55±<br>0.08  | 5.26±<br>0.07  | 5.29±<br>0.09  | <b>.015</b><br><b>(.045)</b> | .728<br>(.78)                | .981<br>(.981)               | 5.63±<br>0.05   | 5.43±<br>0.10  | 5.67±<br>0.05   | 5.78±<br>0.02   | <b>.022</b><br><b>(.165)</b>           | .558<br>(.782) | .063<br>(.27)               |
| Brainstem                         | 12.19<br>± 0.28 | 13.19±<br>0.19 | 12.27±<br>0.46 | 12.81±<br>0.10 | .597<br>(.689)               | <b>.011</b><br><b>(.065)</b> | .432<br>(.903)               | 13.83<br>± 0.20 | 13.80±<br>0.16 | 14.04<br>± 0.38 | 14.59<br>± 0.21 | .051<br>(.255)                         | .304<br>(.782) | .254<br>(.476)              |
| Fimbria                           | 0.53±<br>0.01   | 0.56±<br>0.01  | 0.56±<br>0.06  | 0.59±<br>0.01  | .202<br>(.303)               | .156<br>(.396)               | .877<br>(.94)                | 0.55±<br>0.01   | 0.58±<br>0.01  | 0.55±<br>0.01   | 0.53±<br>0.01   | .093<br>(.318)                         | .678<br>(.782) | .099<br>(.27)               |
| Total brain                       | 100             | 100            | 100            | 100            |                              |                              |                              | 100             | 100            | 100             | 100             |                                        |                |                             |
