# Supplementary material for: Microbiota influence the development of the brain and behaviors in C57BL/6J mice
Source: PubMed Central journal article supplement (PMC6075787; doi:10.1371/journal.pone.0201829), 2018-08-03
Supplement: pone.0201829.s004.pdf [file pone.0201829.s004.pdf]

| MPF                                  | 4 weeks SPF   |               | 4weeks GF     |               | p-value                      |                |                | 12 weeks SPF   |                | 12 week s GF   |                | p-value        |                                        |                              |
|--------------------------------------|---------------|---------------|---------------|---------------|------------------------------|----------------|----------------|----------------|----------------|----------------|----------------|----------------|----------------------------------------|------------------------------|
|                                      | female        | male          | female        | male          | treatment                    | gender         | interaction    | female         | male           | female         | male           | treatment      | gender                                 | interaction                  |
| Hippocampus                          | 7.59±<br>0.09 | 7.91±<br>0.10 | 7.50±<br>0.17 | 7.29±<br>0.16 | <b>.013</b><br><b>(.048)</b> | .692<br>(.871) | .06<br>(.432)  | 7.82±<br>0.12  | 8.67±<br>0.24  | 8.05±<br>0.14  | 8.37±<br>0.29  | .857<br>(.944) | <b>.01</b><br><b>(.016)</b>            | .211<br>(.281)               |
| Corpus callosum<br>/external capsule | 8.85±<br>0.17 | 9.35±<br>0.17 | 8.65±<br>0.14 | 8.49±<br>0.23 | <b>.025</b><br><b>(.057)</b> | .453<br>(.871) | .156<br>(.432) | 10.06±<br>0.17 | 11.05±<br>0.23 | 10.60±<br>0.21 | 10.95±<br>0.56 | .43<br>(.821)  | <b>.022</b><br><b>(.027)</b>           | .257<br>(.316)               |
| Caudate-putamen                      | 7.94±<br>0.10 | 8.37±<br>0.15 | 7.93±<br>0.10 | 7.85±<br>0.14 | .099<br>(.125)               | .294<br>(.871) | .122<br>(.432) | 8.38±<br>0.13  | 9.37±<br>0.23  | 8.68±<br>0.18  | 9.10±<br>0.33  | .944<br>(.944) | <b>.003</b><br><b>(.008)</b>           | .21<br>(.281)                |
| Anterior<br>commissure               | 7.78±<br>0.07 | 8.00±<br>0.09 | 7.69±<br>0.06 | 7.55±<br>0.05 | <b>.008</b><br><b>(.048)</b> | .667<br>(.871) | .075<br>(.432) | 7.94±<br>0.09  | 8.96±<br>0.26  | 8.18±<br>0.12  | 8.68±<br>0.15  | .91<br>(.944)  | <b>&lt;0.001</b><br><b>(&lt;0.001)</b> | .188<br>(.281)               |
| Internal capsule                     | 9.26±<br>0.22 | 9.49±<br>0.20 | 8.64±<br>0.27 | 8.55±<br>0.25 | <b>.007</b><br><b>(.048)</b> | .799<br>(.871) | .568<br>(.606) | 9.60±<br>0.26  | 10.83±<br>0.21 | 9.86±<br>0.39  | 9.92±<br>0.42  | .315<br>(.821) | <b>.05</b><br><b>(.053)</b>            | .077<br>(.269)               |
| Thalamus                             | 8.37±<br>0.09 | 8.69±<br>0.13 | 8.24±<br>0.28 | 8.18±<br>0.28 | .107<br>(.125)               | .508<br>(.871) | .336<br>(.489) | 8.68±<br>0.18  | 9.94±<br>0.23  | 9.08±<br>0.17  | 9.49±<br>0.32  | .912<br>(.944) | <b>.001</b><br><b>(.004)</b>           | .082<br>(.269)               |
| Cerebellum                           | 8.38±<br>0.15 | 8.32±<br>0.13 | 8.04±<br>0.19 | 8.19±<br>0.22 | .231<br>(.231)               | .81<br>(.871)  | .615<br>(.615) | 8.52±<br>0.17  | 9.47±<br>0.28  | 8.49±<br>0.18  | 8.93±<br>0.32  | .275<br>(.821) | <b>.011</b><br><b>(.016)</b>           | .332<br>(.354)               |
| Hypothalamus                         | 7.17±<br>0.11 | 7.41±<br>0.10 | 7.03±<br>0.13 | 6.92±<br>0.09 | .021<br>(.056)               | .611<br>(.871) | .2<br>(.432)   | 7.34±<br>0.14  | 8.28±<br>0.16  | 7.66±<br>0.21  | 7.88±<br>0.20  | .828<br>(.944) | <b>.003</b><br><b>(.008)</b>           | .056<br>(.269)               |
| Central gray                         | 7.32±<br>0.10 | 7.44±<br>0.15 | 7.03±<br>0.15 | 6.81±<br>0.18 | .01<br>(.048)                | .764<br>(.871) | .314<br>(.489) | 7.59±<br>0.16  | 8.59±<br>0.26  | 7.77±<br>0.18  | 8.09±<br>0.28  | .513<br>(.821) | <b>.01</b><br><b>(.016)</b>            | .167<br>(.281)               |
| Neocortex                            | 7.62±<br>0.08 | 7.88±<br>0.11 | 7.53±<br>0.08 | 7.49±<br>0.10 | .05<br>(.086)                | .365<br>(.871) | .216<br>(.432) | 7.90±<br>0.12  | 8.74±<br>0.24  | 8.01±<br>0.14  | 8.35±<br>0.14  | .482<br>(.821) | <b>.006</b><br><b>(.012)</b>           | .211<br>(.281)               |
| Amygdala                             | 7.34±<br>0.10 | 7.58±<br>0.11 | 7.23±<br>0.12 | 7.17±<br>0.11 | .054<br>(.086)               | .511<br>(.871) | .27<br>(.48)   | 7.63±<br>0.12  | 8.60±<br>0.24  | 7.76±<br>0.15  | 8.19±<br>0.11  | .49<br>(.821)  | <b>.001</b><br><b>(.004)</b>           | .184<br>(.281)               |
| Olfactory bulbs                      | 7.11±<br>0.15 | 7.49±<br>0.17 | 6.90±<br>0.20 | 7.05±<br>0.16 | .109<br>(.125)               | .183<br>(.871) | .56<br>(.606)  | 7.49±<br>0.18  | 8.85±<br>0.41  | 7.47±<br>0.24  | 7.66±<br>0.28  | .077<br>(.821) | <b>.025</b><br><b>(.029)</b>           | .084<br>(.269)               |
| Brainstem                            | 8.93±<br>0.13 | 9.16±<br>0.12 | 8.70±<br>0.23 | 8.67±<br>0.13 | .036<br>(.072)               | .554<br>(.871) | .444<br>(.546) | 9.29±<br>0.13  | 10.51±<br>0.34 | 9.42±<br>0.19  | 9.49±<br>0.26  | .106<br>(.821) | <b>.021</b><br><b>(.027)</b>           | <b>.037</b><br><b>(.269)</b> |
| Fimbria                              | 7.66±<br>0.14 | 8.05±<br>0.22 | 7.48±<br>0.22 | 7.20±<br>0.33 | .059<br>(.086)               | .817<br>(.871) | .211<br>(.432) | 8.51±<br>0.15  | 9.48±<br>0.23  | 8.97±<br>0.13  | 9.35±<br>0.40  | .462<br>(.821) | <b>.006</b><br><b>(.012)</b>           | .206<br>(.281)               |
| Prefrontal cortex                    | 8.46±<br>0.22 | 8.58±<br>0.29 | 8.27±<br>0.51 | 7.80±<br>0.34 | .17<br>(.181)                | .621<br>(.871) | .41<br>(.546)  | 8.93±<br>0.16  | 10.03±<br>0.31 | 9.07±<br>0.37  | 10.43±<br>0.39 | .375<br>(.821) | <b>&lt;0.001</b><br><b>(&lt;0.001)</b> | .674<br>(.674)               |
| Total brain                          | 8.14±<br>0.26 | 8.77±<br>0.28 | 7.81±<br>0.58 | 7.23±<br>0.36 | <b>.015</b><br><b>(.048)</b> | .946<br>(.946) | .108<br>(.432) | 8.58±<br>0.60  | 9.58±<br>0.27  | 9.54±<br>0.66  | 9.17±<br>0.67  | .661<br>(.944) | .621<br>(.621)                         | .279<br>(.319)               |
